# Supplementary material for: The role of neuromedin U in adiposity regulation. Haplotype analysis in European children from the IDEFICS Cohort
Source: PLOS journal article supplement (doi:10.1371/journal.pone.0172698), 2017-02-24

**S1 Fig. NMU gene, linkage disequilibrium plot and haplotype structure.** Gene coordinates: chr4: 55595229-55636698, GRCh38.p7 Assembly; Haploview v.4.2, Caucasian population (HapMap-CEU data). Gianfagna F et al, The Role of neuromedin U in Adiposity Regulation. Haplotype Analysis in European Children from the IDEFICS Cohort; *Plos One* 2017, doi:10.1371/journal.pone.0172698

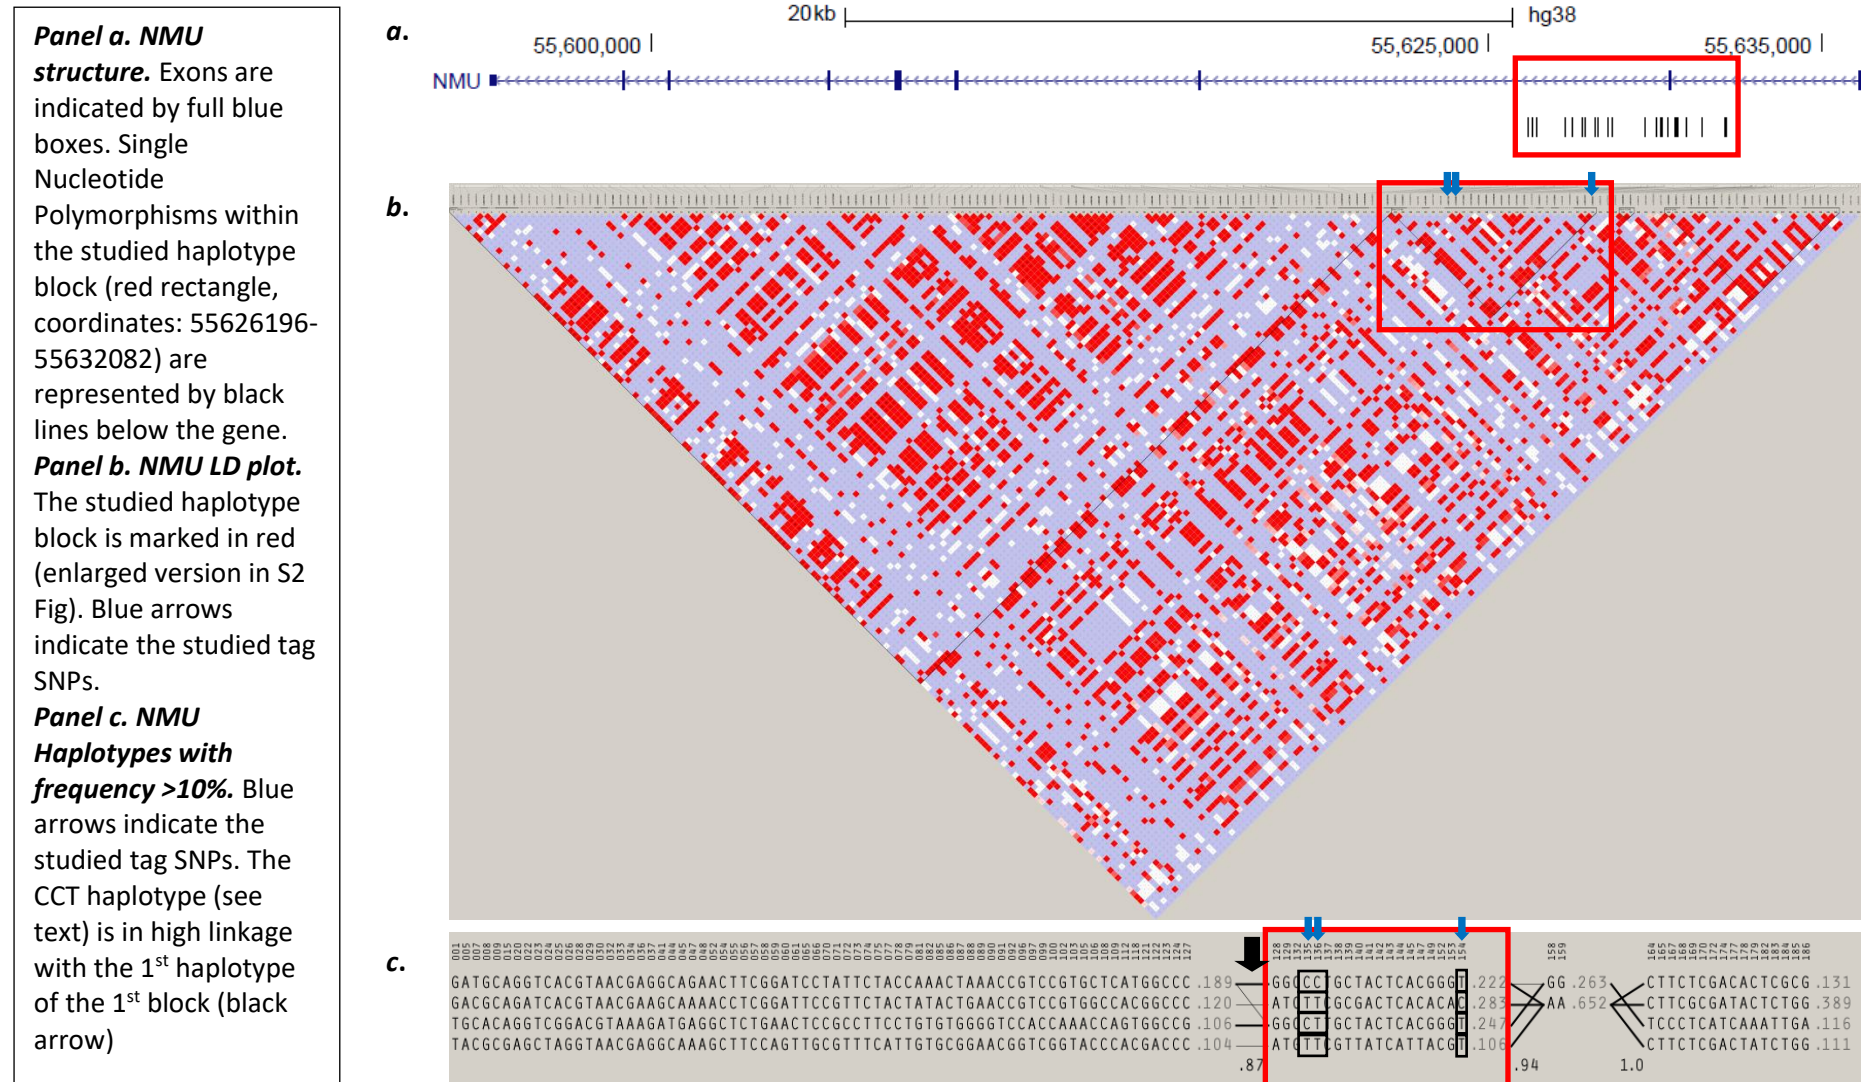

Supplement: S1 (10.1371/journal.pone.0172698.s001) [file journal.pone.0172698.s001]
